# Supplementary material
Source: PubMed Central journal article supplement (PMC7736539)
Supplement: NIHMS1634920-supplement-1.pdf [file NIHMS1634920-supplement-1.pdf]

Supplementary Table 1

## Key Drug Metabolizing Enzymes and Transporters Measured

| Human Gene Symbol | Mouse mRNA Symbol | Mouse mRNA Name                                                            | Mouse RefSeq mRNA ID | Mouse Probe Set ID | Mouse Protein Symbol | Mouse Protein Name                             | Mouse UniProt ID | Mouse Proteotypic Peptide Sequence |
|-------------------|-------------------|----------------------------------------------------------------------------|----------------------|--------------------|----------------------|------------------------------------------------|------------------|------------------------------------|
| ABCG2             | Abcg2             | ATP-binding cassette sub-family G member 2                                 | NM_011920            | TC0600000711.mm.2  | Bcrp1                | ATP-binding cassette sub-family G member 2     | Q7TMS5           | SSLLDVLAARK                        |
| ABCB11            | Abcb11            | ATP-binding cassette, sub-family B (Mdr/Tap), member 11                    | NM_021022            | TC0200003698.mm.2  | Bsep                 | Bile salt export pump                          | Q9QY30           | STALQLIQR                          |
| CYP1A2            | Cyp1a2            | Cytochrome P450 1a2                                                        | NM_009993            | TC0900002379.mm.2  | Cyp1a2               | Cytochrome P450 1a2                            | P00186           | NSIQDITSALFK                       |
| CYP2C9            | Cyp2c29           | Cytochrome P450 2c29                                                       | NM_007815            | TC1900000565.mm.2  | Cyp2c29              | Cytochrome P450 2c29                           | Q64458           | NISQSFTNFSK                        |
| CYP2E1            | Cyp2e1            | Cytochrome P450 2e1                                                        | NM_021282            | TC0700002023.mm.2  | Cyp2e1               | Cytochrome P450 2e1                            | Q05421           | GIIFNNGPTWK                        |
| CYP3A4            | Cyp3a11           | Cytochrome P450 3a11                                                       | NM_007818            | TC0500003600.mm.2  | Cyp3a11              | Cytochrome P450 3a11                           | Q64459           | LYPIANR                            |
| ABCB4             | Abcb4             | ATP-binding cassette, sub-family B (Mdr/Tap), member 4                     | NM_008830            | TC0500000054.mm.2  | Mdr3/2               | Multidrug resistance protein 2                 | P21440           | IATEAIENIR                         |
| ABCC2             | Abcc2             | ATP-binding cassette, sub-family C (Cftr/Mrp), member 2                    | NM_013806            | TC1900000636.mm.2  | Mrp2                 | Multispecific organic anion transporter 1      | Q8VI47           | EAGIESVNHTEL                       |
| ABCC3             | Abcc3             | ATP-binding cassette, sub-family C (Cftr/Mrp), member 3                    | NM_029600            | TC1100003561.mm.2  | Mrp3                 | Multispecific organic anion transporter 2      | B2RX12           | GALVAVVGPVGC<br>GK                 |
| NTCP              | Slc10a1           | Solute carrier family 10 (sodium/bile acid cotransporter family), member 1 | NM_001177561         | TC1200002011.mm.2  | Ntcp                 | Sodium/taurocholate cotransporting polypeptide | O08705           | GIYDGDLLK                          |

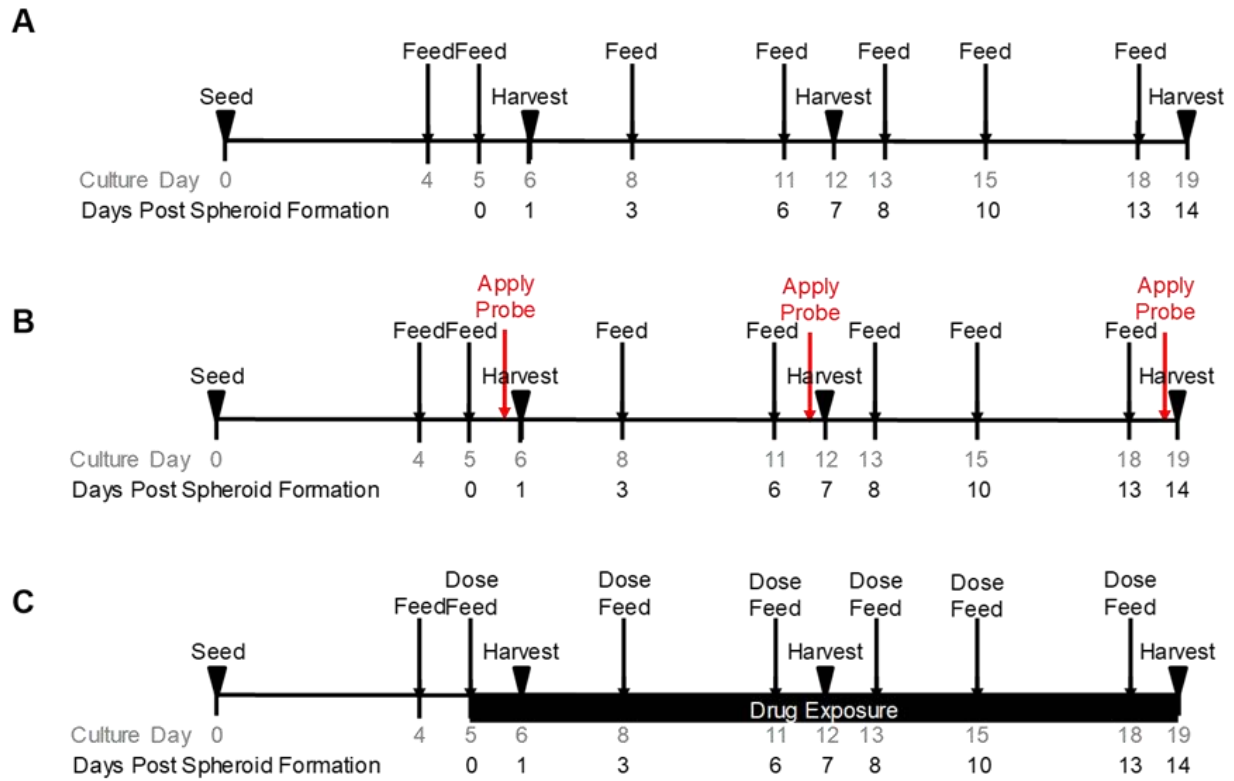

**Supplementary Figure 1.** Schematic of treatment regimens for measurement of (A) baseline viability, albumin and spheroid diameter, (B) cytochrome P450 activity, and (C) effect of drug exposure over time.

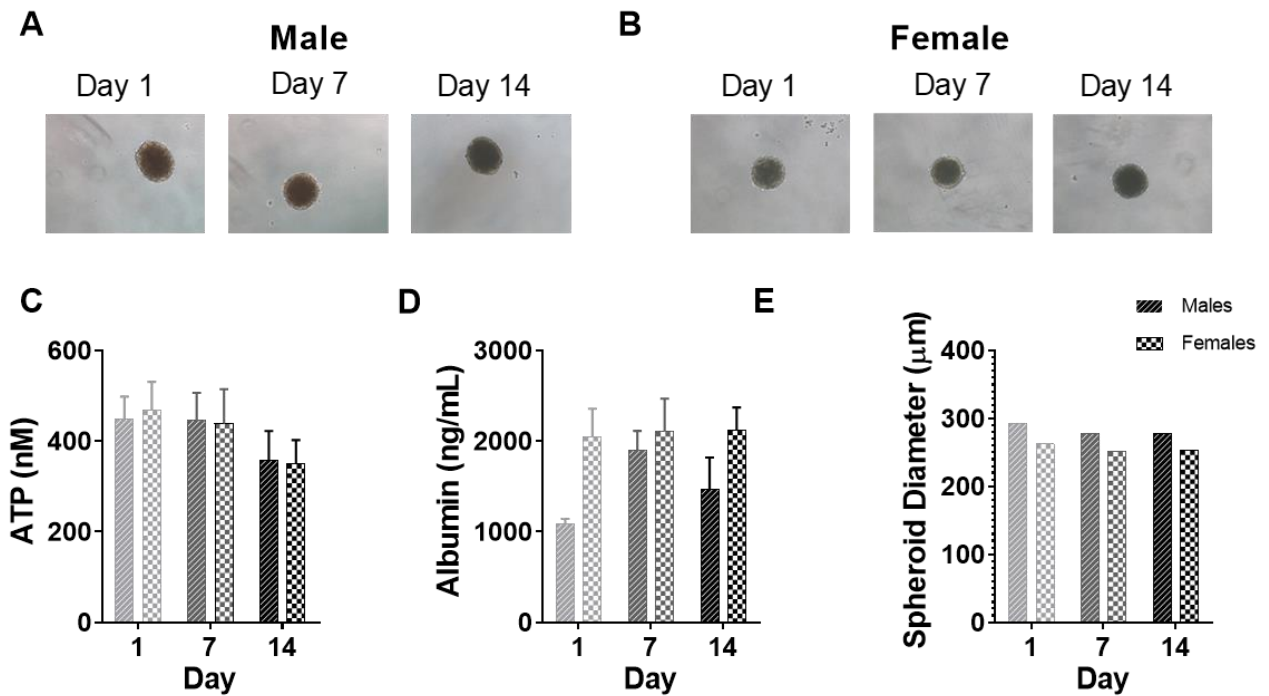

**Supplementary Figure 2.** Representative phase-contrast photomicrographs showing morphology of (A) male and (B) female spheroids at 10X magnification on Days 1, 7, and 14 post spheroid formation. (C) ATP, (D) albumin, and (E) spheroid diameter measured over time in males and females. Data represent the mean+SEM from N=3 preparations per sex for ATP and albumin, and N=1 preparation per sex for spheroid size. No significant differences were observed between sexes in baseline ATP, albumin, or spheroid diameter at any time point as determined by repeated measures ANOVA with Sidak's multiple comparison test comparing females to males on each day.

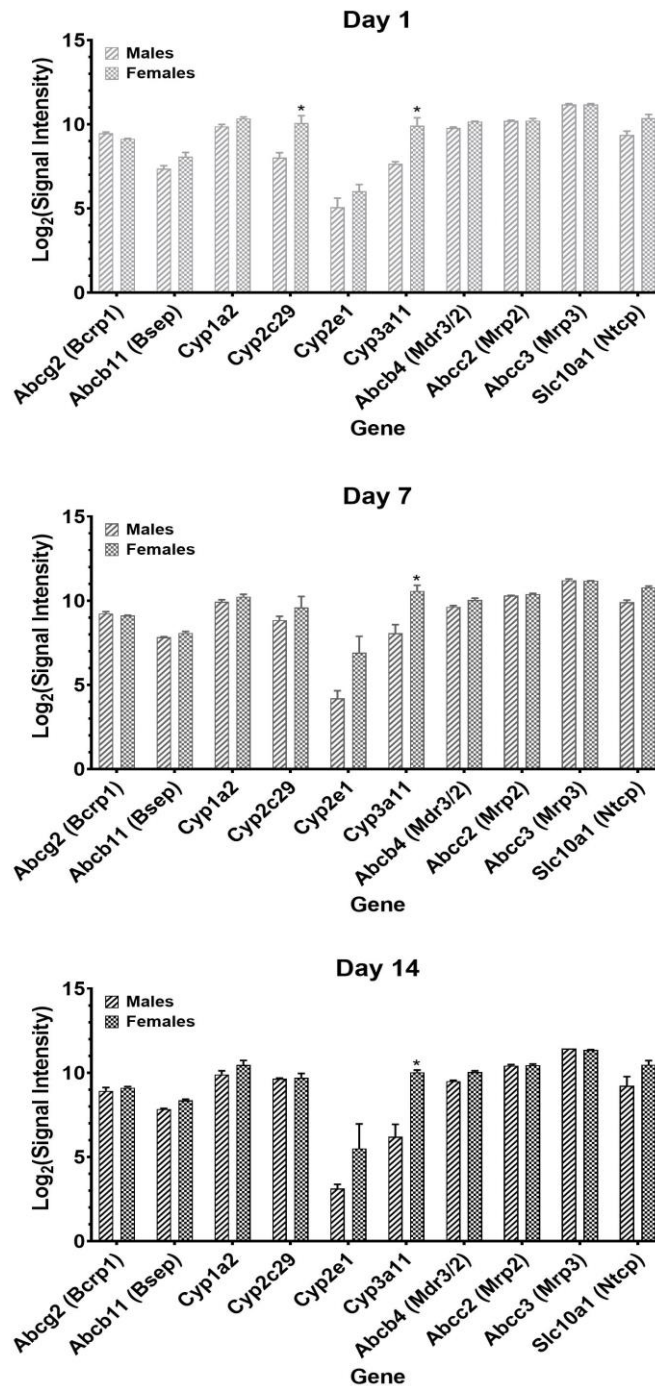

**Supplementary Figure 3.** Log<sub>2</sub>(signal intensity) for 10 key drug metabolizing enzymes and transporter mRNAs in spheroid culture over time. Data represent the geometric mean+SD of N=2 male and N=2 female preparations. \* indicates FDR  $p < 0.05$  and IFCI  $> 2$  as determined by one-way ANOVA with linear contrasts comparing sex within model.

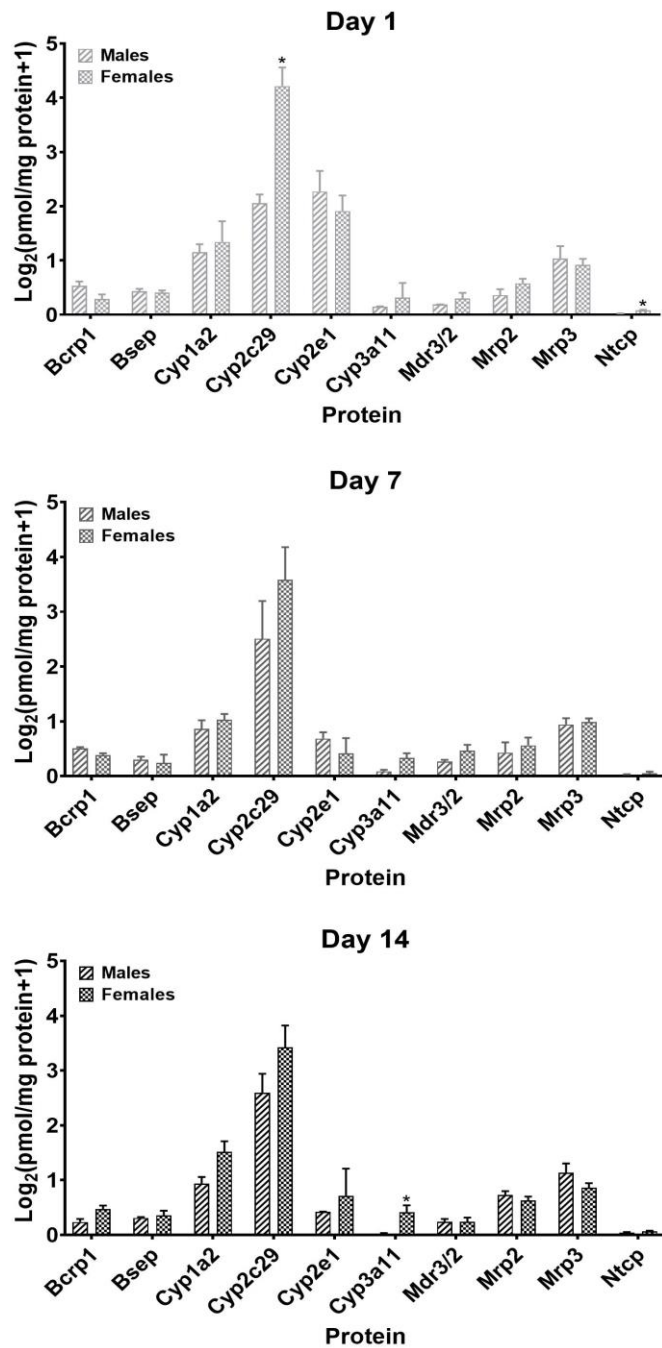

**Supplementary Figure 4.** Log<sub>2</sub>(pmol/mg protein+1) for 10 key drug metabolizing enzymes and transporter proteins in spheroid culture over time. Data represent the geometric mean+SD of N=3 male and N=3 female preparations. \* indicates FDR  $p < 0.05$  and IFCI  $> 2$  as determined by one-way ANOVA with linear contrasts for sex within each time point.

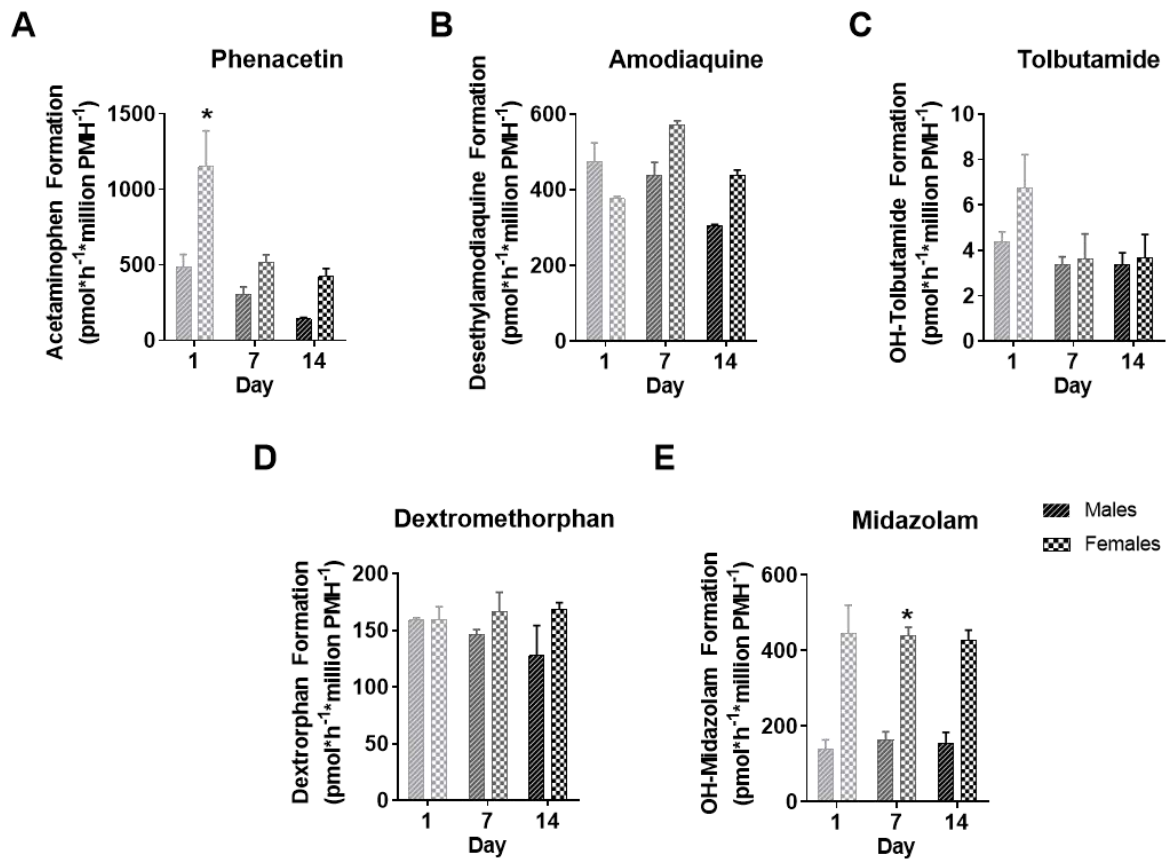

**Supplementary Figure 5.** Metabolite levels measured after a 4-hour incubation with cytochrome P450 substrate cocktail. Data are presented as mean+SEM from N=2 preparations per sex. \* indicates  $p < 0.05$  as determined by repeated measures ANOVA with Sidak's multiple comparison test comparing females to males on each day.
